# Supplementary material for: Construction of Potential Gene Expression and Regulation Networks in Prostate Cancer Using Bioinformatics Tools
Source: Hindawi journal article supplement (doi:10.1155/2021/8846951), 2021-01-01

**A****Up-DEGs**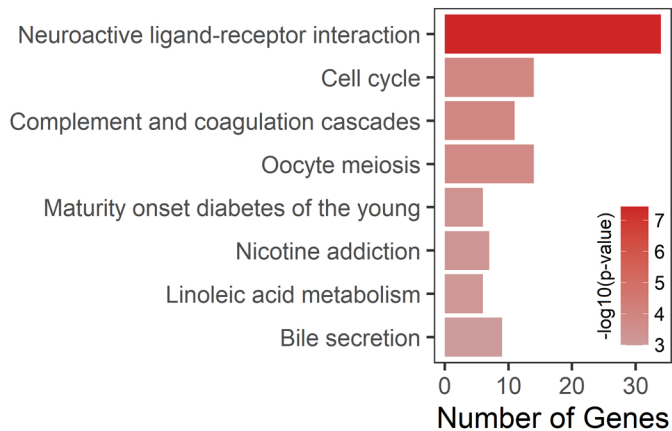**B****Down-DEGs**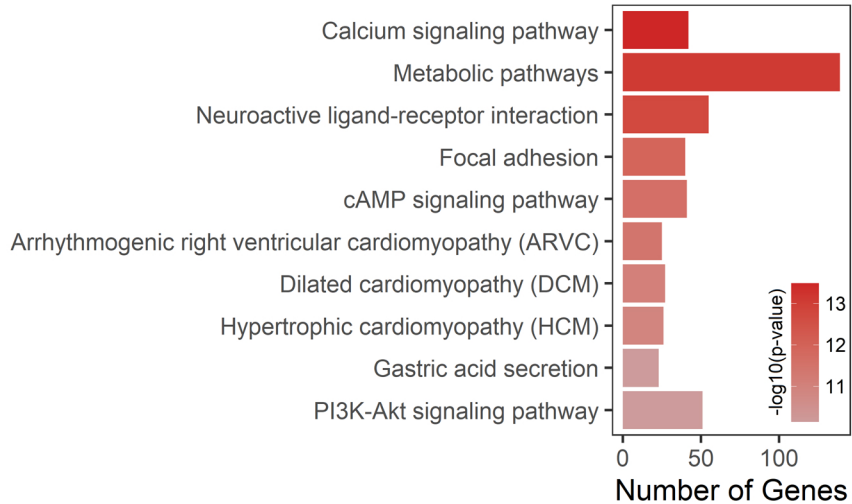

Supplement: f1 [file 8846951.f1.pdf]
